# Supplementary material for: Phthalocyanine-cRGD conjugate: synthesis, photophysical properties and in vitro biological activity for targeting photodynamic therapy
Source: Royal Society of Chemistry journal article supplement (doi:10.1039/c6ob00099a), 2016-01-01
Supplement: c6ob00099a1.pdf [file c6ob00099a1.pdf]

## **Supporting Information**

### **Phthalocyanine-cRGD Conjugate: Synthesis, Photophysical Properties and *in vitro* Cell Study for Targeting Photodynamic Therapy**

Liqiang Luan, Wenjuan Fang, Wei Liu,\* Minggang Tian, Yuxing Ni, Xi Chen, Xiaoqiang Yu

## Content

Figure S1. HPLC chromatogram of the phthalocyanine-peptide conjugate **6** (solvent A = H<sub>2</sub>O and solvent B = DMF, gradient: solvent A from 50% to 0 in 25 minutes, flow rate 1 mL/min).

Figure S2. <sup>1</sup>H NMR spectrum of **1** in CDCl<sub>3</sub>

Figure S3. <sup>13</sup>C NMR spectrum of **1** in CDCl<sub>3</sub>.

Figure S4. <sup>1</sup>H NMR spectrum of **3** in CDCl<sub>3</sub> with a trace amount of pyridine-d<sub>5</sub>.

Figure S5. <sup>1</sup>H NMR spectrum of **4** in CDCl<sub>3</sub> with a trace amount of pyridine-d<sub>5</sub>.

Figure S6. MALDI-TOF mass spectra of **3**.

Figure S7. MALDI-TOF mass spectra of **4**.

Figure S8. The measured HRMS (upper) and simulated (lower) mass spectra by Chemdraw of **6**. The insert gives a broad view of the HRMS spectra.

Figure S9. Electronic absorption spectra of **6** (solid) and **4** (dash) in DMF at concentration of ~0.5 μM.

Figure S10. Fluorescence spectra of **6** (solid) and **4** (dash) in DMF excited at 610 nm. Both compounds were at concentration of ~0.5 μM.

Figure S11. Normalized electronic absorption (solid) and fluorescence (dash) spectra of **4** in DMF.

Figure S12. Normalized electronic absorption (solid) and fluorescence (dash) spectra of **6** in DMF.

Figure S13. Electronic absorption spectra of **4** at different concentration in DMF. The insert plots the Q band absorption at 670 nm versus the concentration of **4**.

Figure S14. Electronic absorption spectra of **6** (solid) and **4** (dash) in RPMI medium 1640 formulated with 0.1% of Cremophor EL (v/v). Both compounds were at concentration of 2 μM.

Figure S15. Fluorescence spectra of **6** (solid) and **4** (dash) in RPMI medium 1640 formulated with 0.1% of Cremophor EL (v/v) excited at 610 nm. Both compounds were at concentration of 2  $\mu\text{M}$ .

Figure S16. Absorption change of **4** (2  $\mu\text{M}$ ) and DPBF (40  $\mu\text{M}$ ) in DMF upon exposure to red light ( $\lambda > 610\text{ nm}$ , fluence rate 0.2  $\text{mW}/\text{cm}^2$ ). The insert shows the rates of photodegradation of DPBF with irradiation time.

Figure S17. Absorption change of **4** (4  $\mu\text{M}$ ) and DPBF (80  $\mu\text{M}$ ) in RPMI medium 1640 formulated with 0.1% of Cremophor EL (v/v) upon exposure to red light ( $\lambda > 610\text{ nm}$ , fluence rate 0.2  $\text{mW}/\text{cm}^2$ ). The insert shows the rates of photodegradation of DPBF with irradiation time.

Figure S18. Absorption change of **6** (2  $\mu\text{M}$ ) and DPBF (40  $\mu\text{M}$ ) in DMF upon exposure to red light ( $\lambda > 610\text{ nm}$ , fluence rate 0.2  $\text{mW}/\text{cm}^2$ ). The insert shows the rates of photodegradation of DPBF with irradiation time.

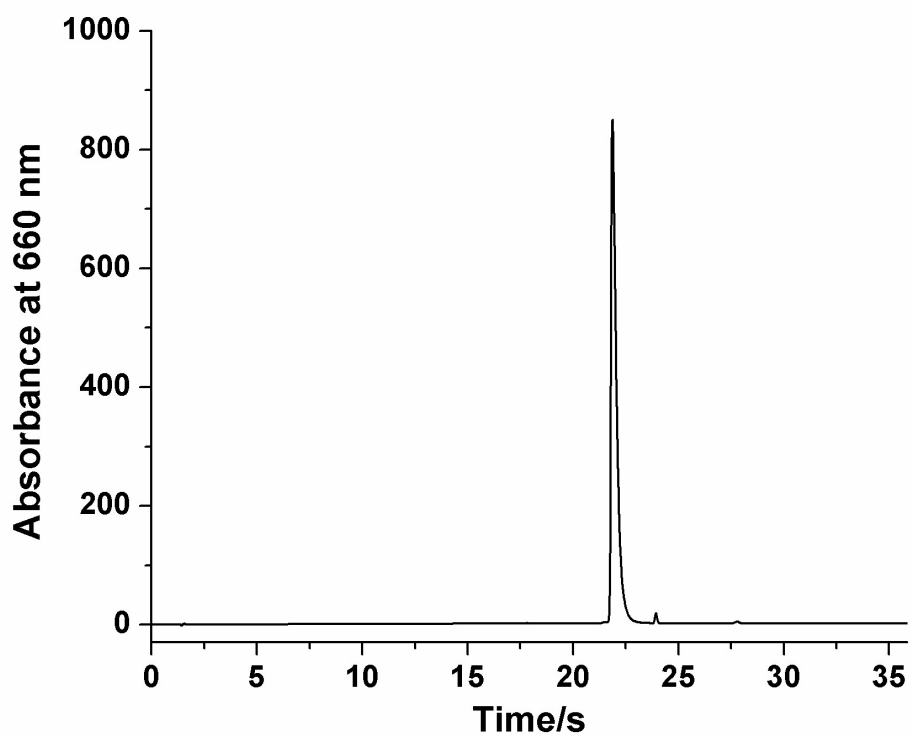

Figure S1. HPLC chromatogram of the phthalocyanine-peptide conjugate **6** (solvent A = H<sub>2</sub>O and solvent B = DMF, gradient: solvent A from 50% to 0 in 25 minutes, flow rate 1 mL/min).

In the following spectra, the residual solvent signals are marked with asterisks.

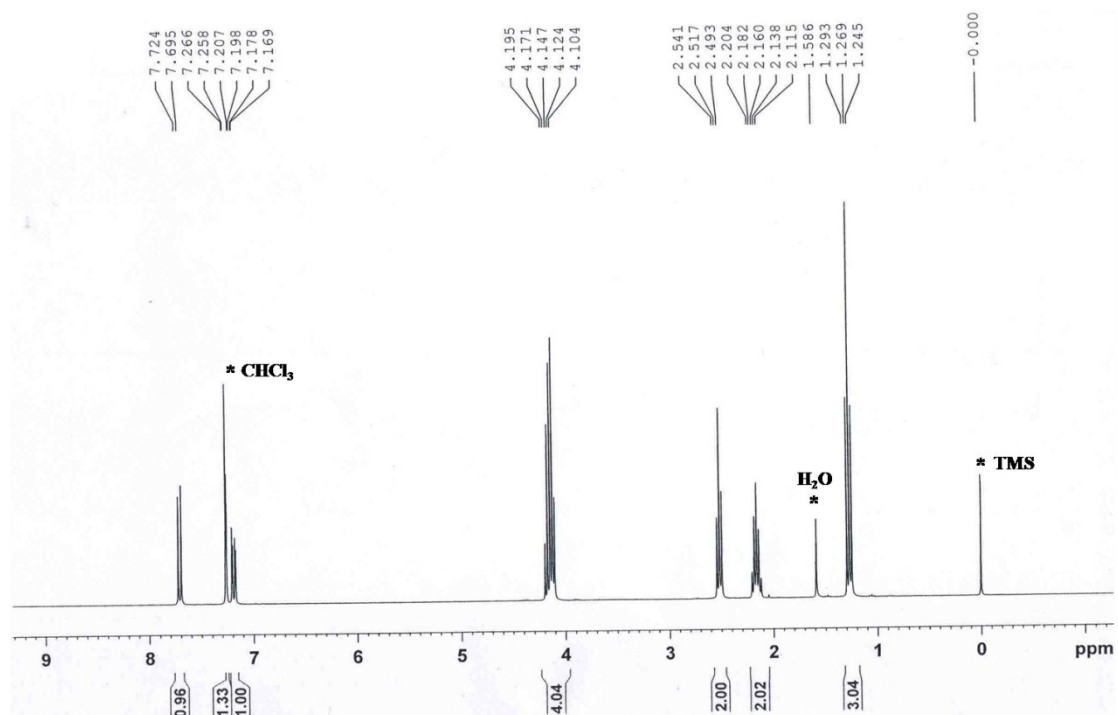

Figure S2. <sup>1</sup>H NMR spectrum of **1** in CDCl<sub>3</sub>

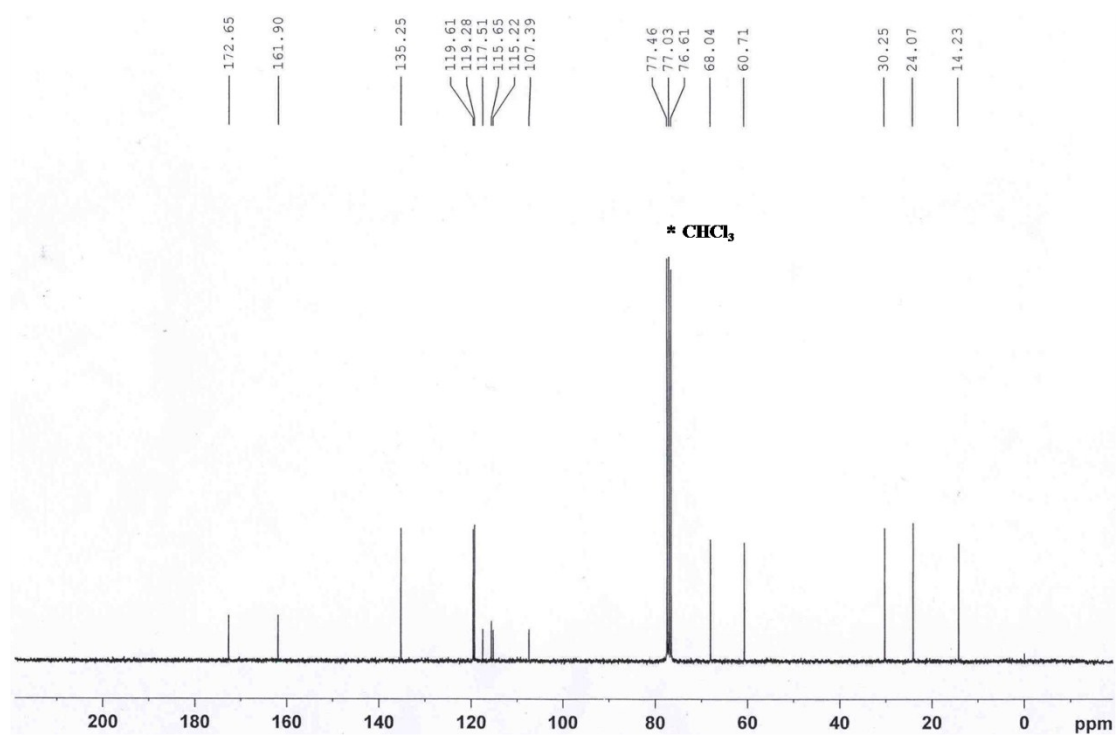

Figure S3. <sup>13</sup>C NMR spectrum of **1** in CDCl<sub>3</sub>.

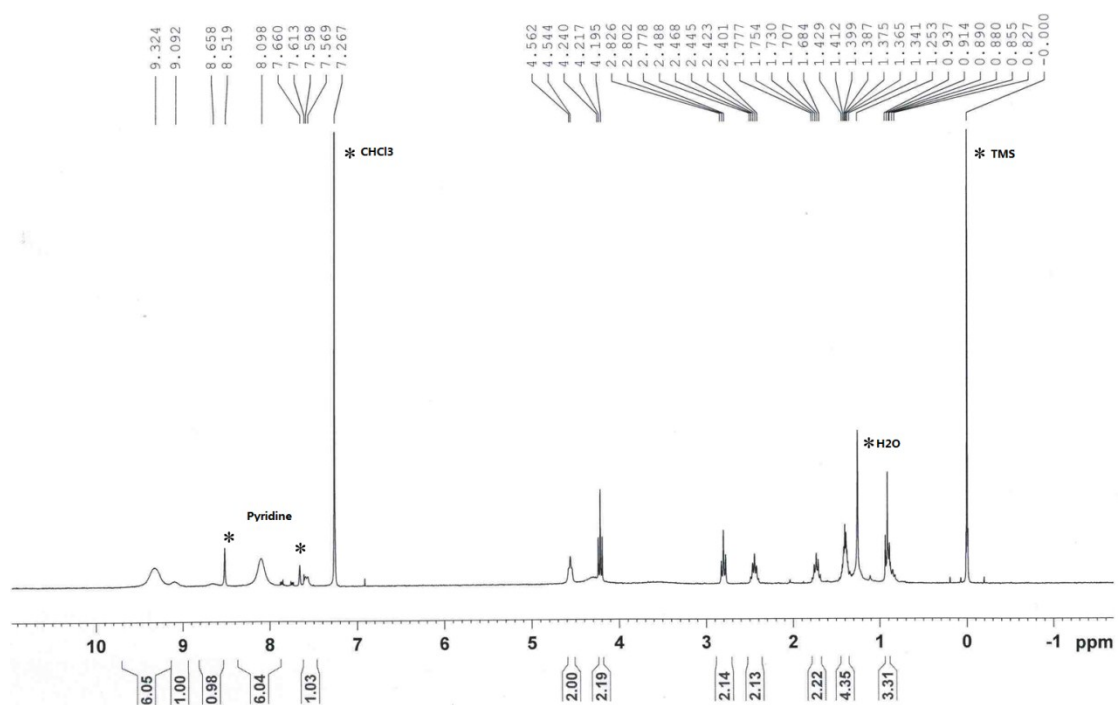

Figure S4. <sup>1</sup>H NMR spectrum of **3** in CDCl<sub>3</sub> with a trace amount of pyridine-d<sub>5</sub>.

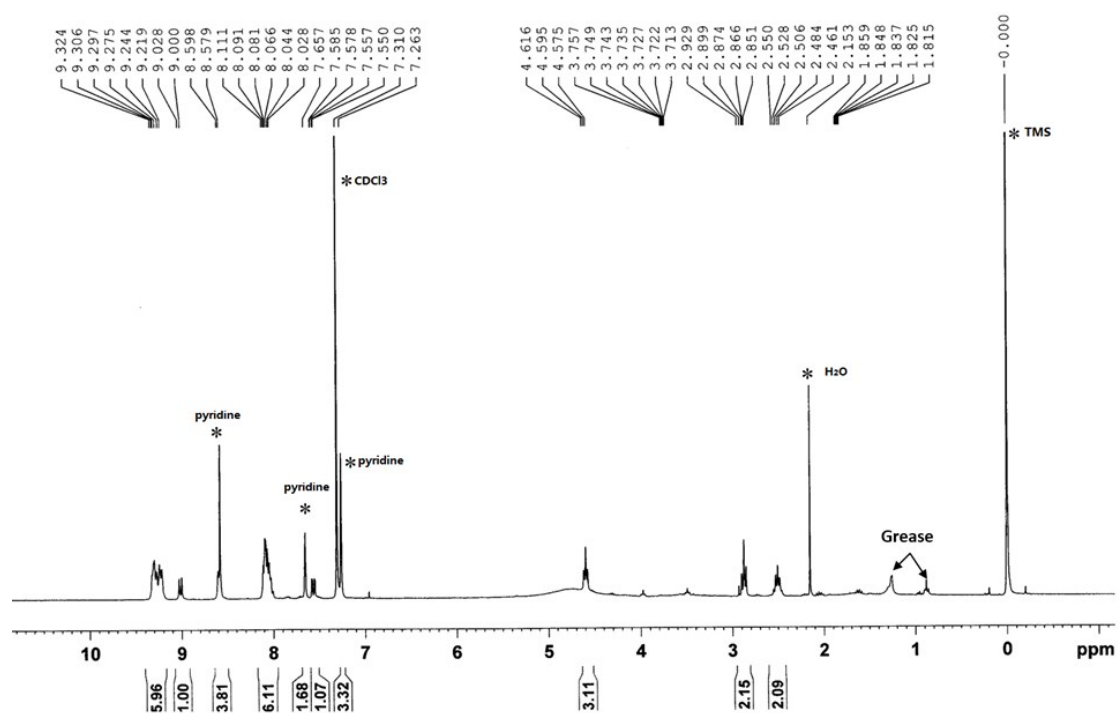

Figure S5. <sup>1</sup>H NMR spectrum of **4** in CDCl<sub>3</sub> with a trace amount of pyridine-d<sub>5</sub> ( the compound was recrystallized from THF).

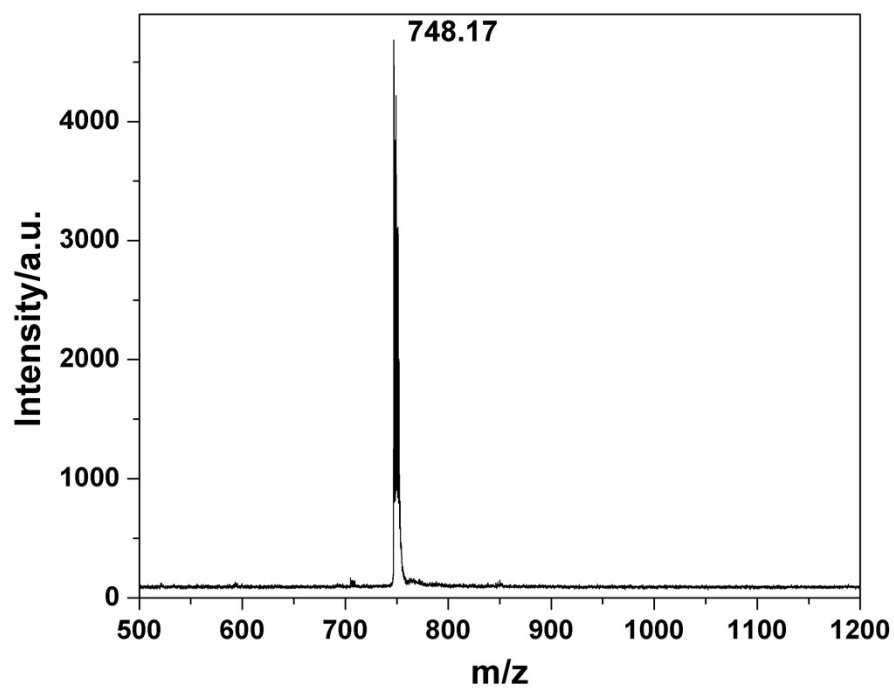

Figure S6. MALDI-TOF mass spectra of **3**.

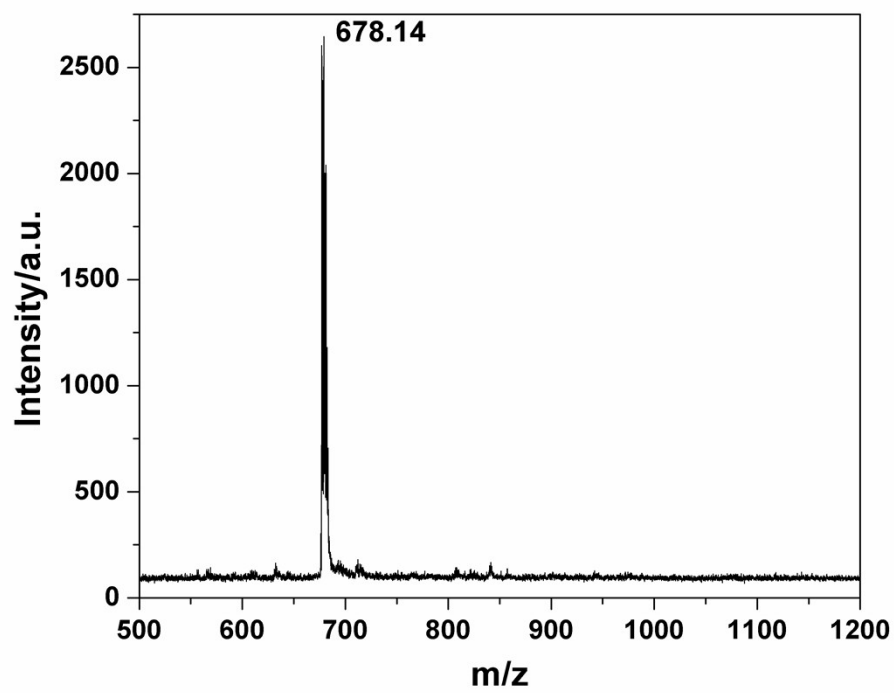

Figure S7. MALDI-TOF mass spectra of **4**.

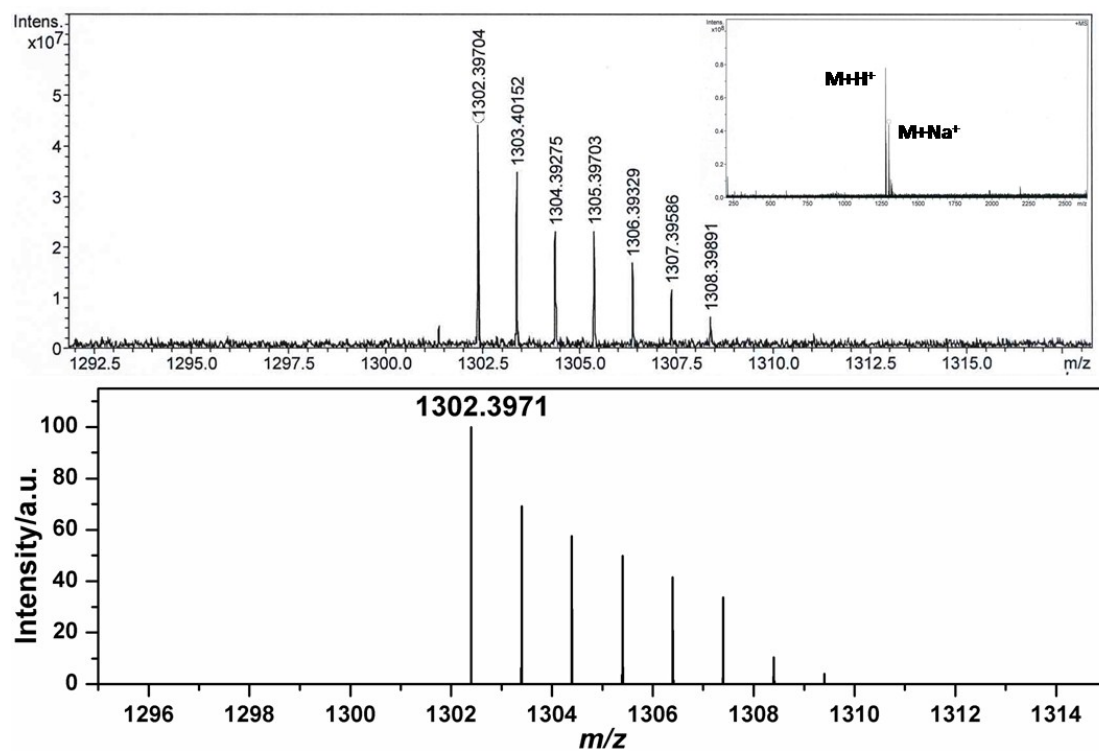

Figure S8. The measured HRMS (upper) and simulated (lower) mass spectra by Chemdraw of **6**. The insert gives a broad view of the HRMS spectra.

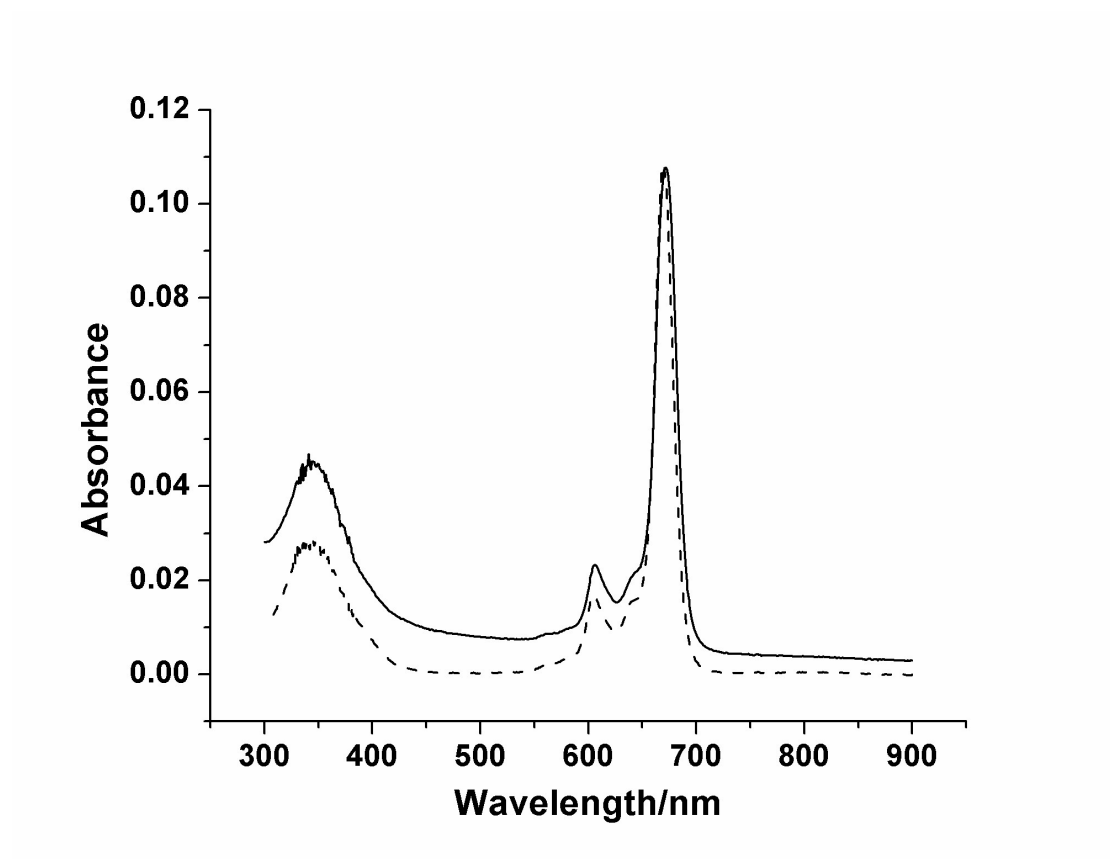

Figure S9. Electronic absorption spectra of **6** (solid) and **4** (dash) in DMF at concentration of  $\sim 0.5 \mu\text{M}$ .

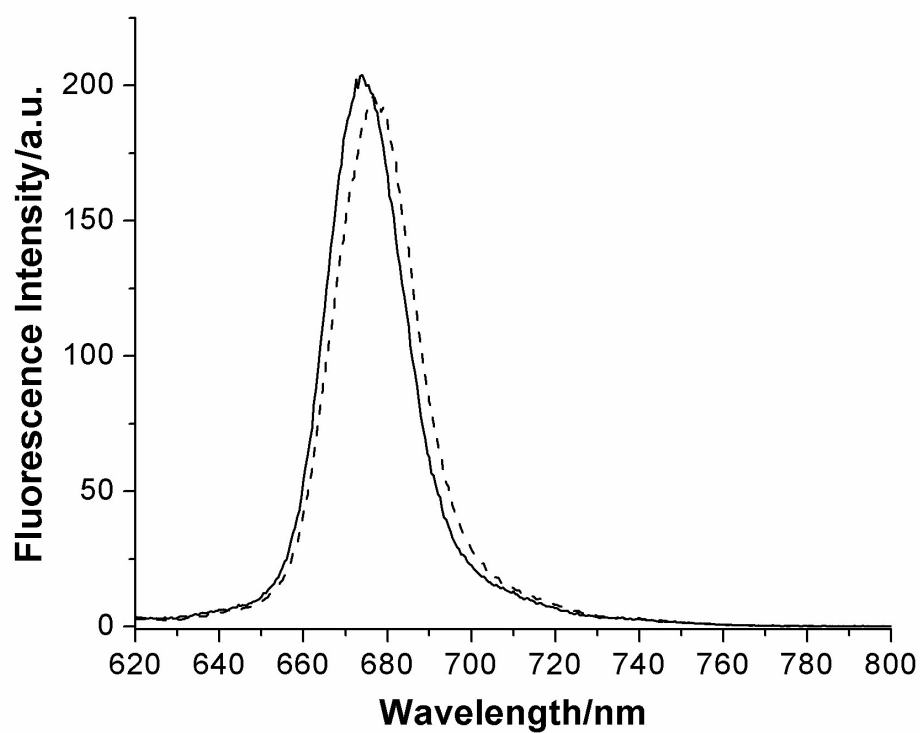

Figure S10. Fluorescence spectra of **6** (solid) and **4** (dash) in DMF excited at 610 nm. Both compounds were at concentration of  $\sim 0.5 \mu\text{M}$ .

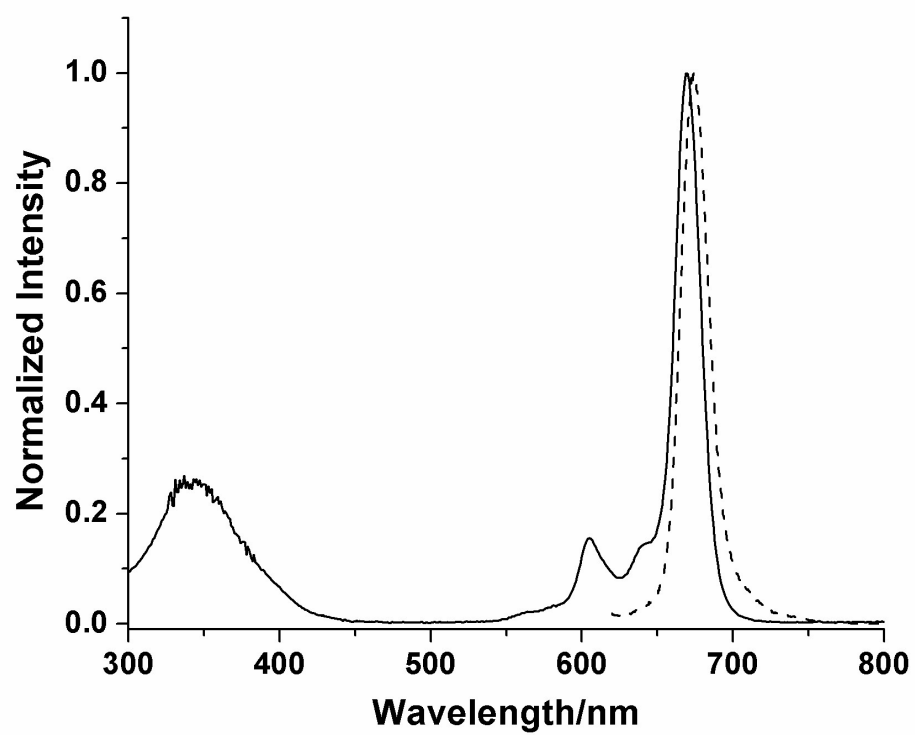

Figure S11. Normalized electronic absorption (solid) and fluorescence (dash) spectra of **4** in DMF.

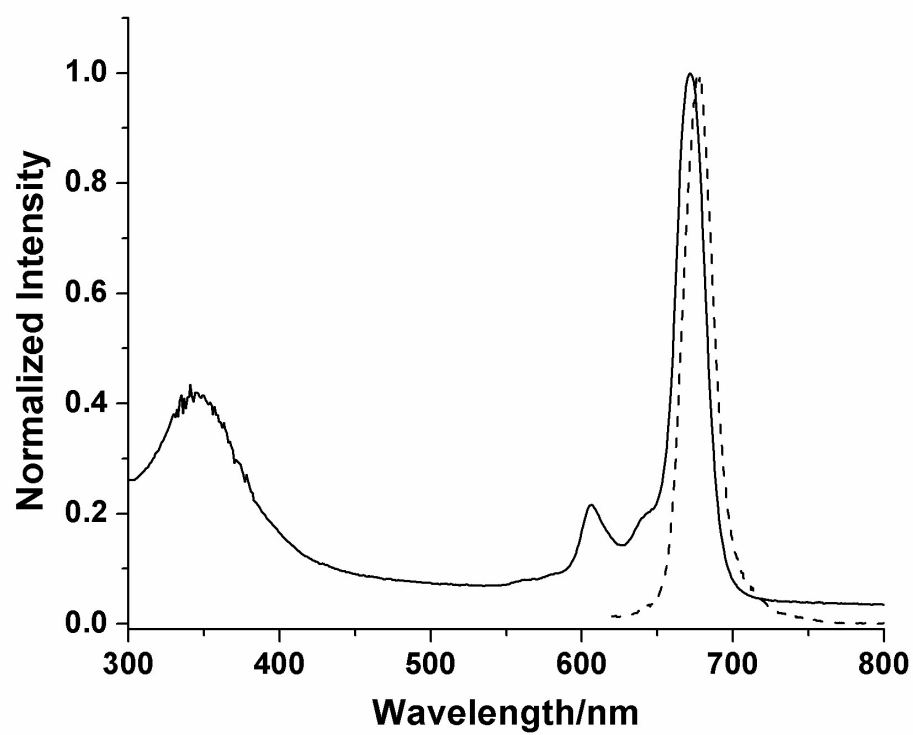

Figure S12. Normalized electronic absorption (solid) and fluorescence (dash) spectra of **6** in DMF.

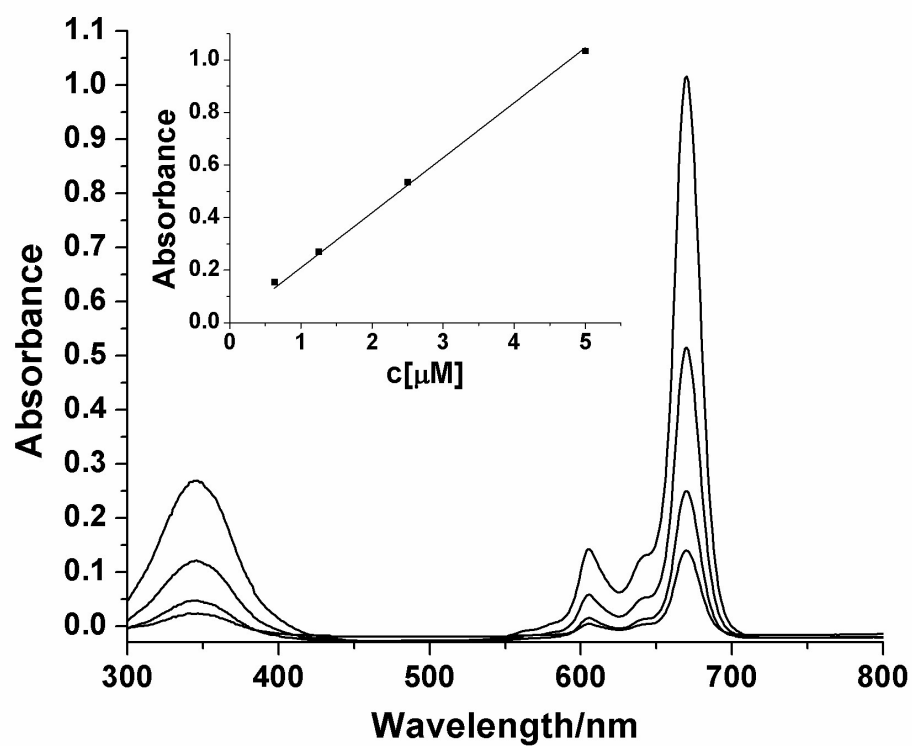

Figure S13. Electronic absorption spectra of **4** at different concentration in DMF. The insert plots the Q band absorption at 670 nm versus the concentration of **4**.

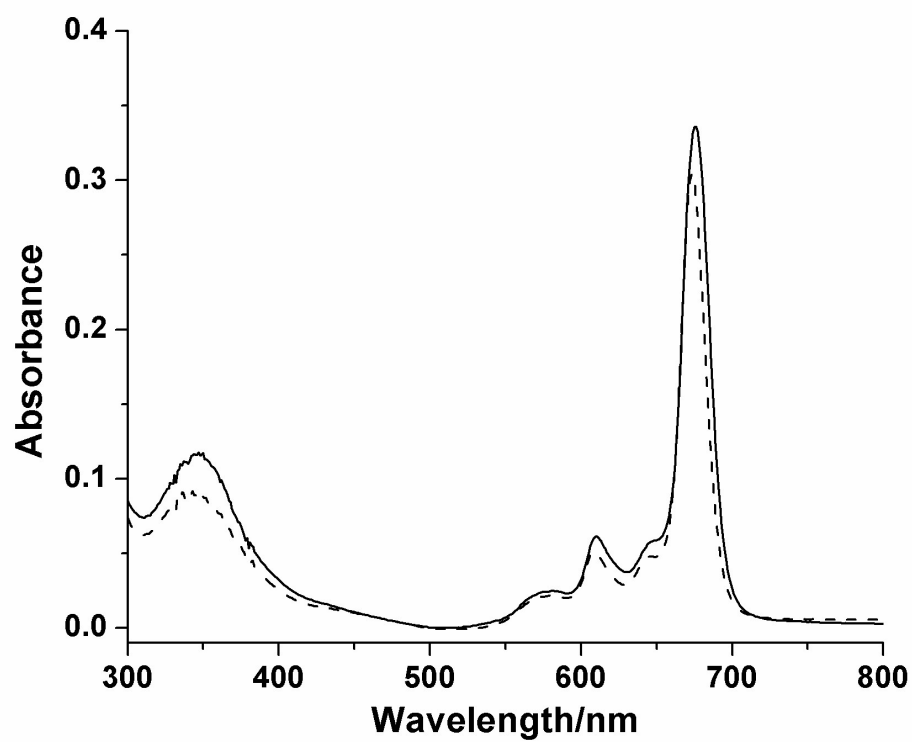

Figure S14. Electronic absorption spectra of **6** (solid) and **4** (dash) in RPMI medium 1640 formulated with 0.1% of Cremophor EL (v/v). Both compounds were at concentration of 2  $\mu$ M.

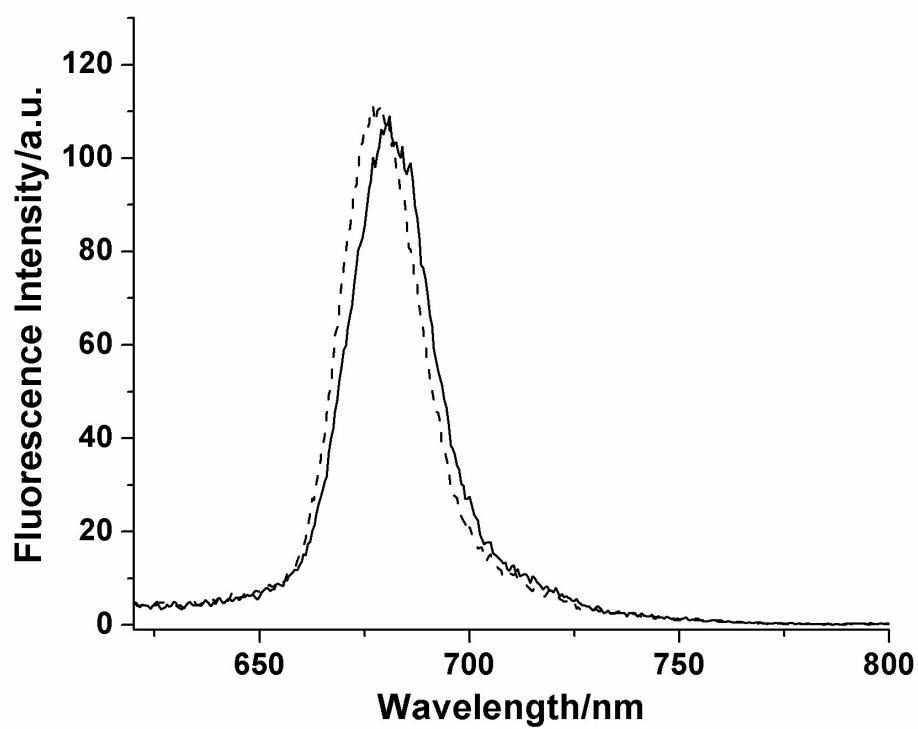

Figure S15. Fluorescence spectra of **6** (solid) and **4** (dash) in RPMI medium 1640 formulated with 0.1% of Cremophor EL (v/v) excited at 610 nm. Both compounds were at concentration of 2  $\mu$ M.

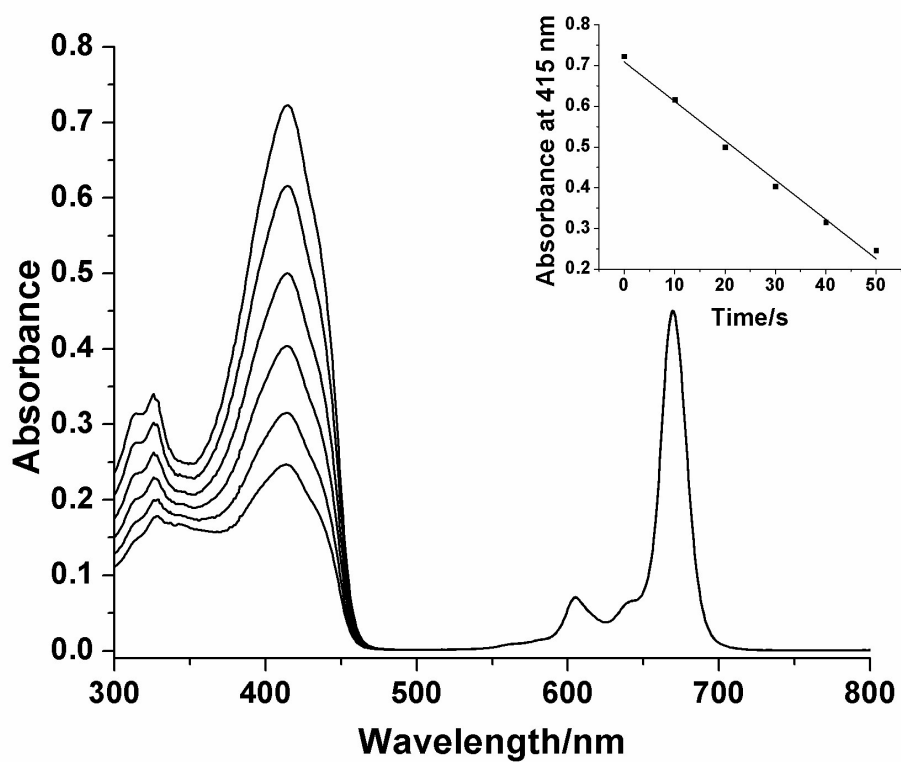

Figure S16. Absorption change of **4** (2  $\mu\text{M}$ ) and DPBF (40  $\mu\text{M}$ ) in DMF upon exposure to red light ( $\lambda > 610 \text{ nm}$ , fluence rate 0.2  $\text{mW}/\text{cm}^2$ ). The insert shows the rates of photodegradation of DPBF with irradiation time.

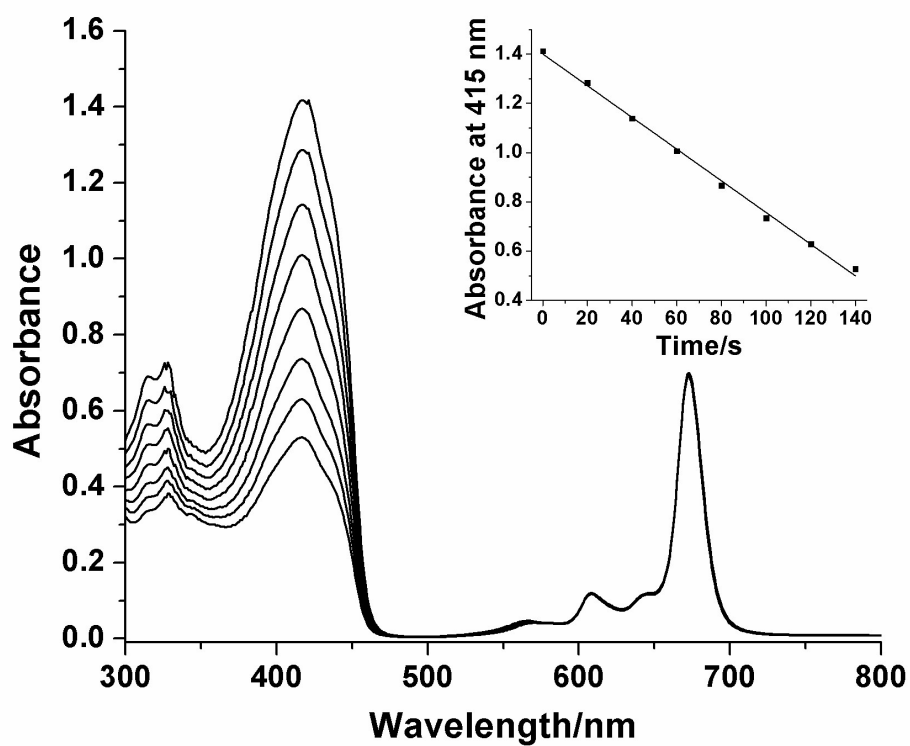

Figure S17. Absorption change of **4** (4  $\mu\text{M}$ ) and DPBF (80  $\mu\text{M}$ ) in RPMI medium 1640 formulated with 0.1% of Cremophor EL (v/v) upon exposure to red light ( $\lambda > 610 \text{ nm}$ , fluence rate 0.2  $\text{mW}/\text{cm}^2$ ). The insert shows the rates of photodegradation of DPBF with irradiation time.

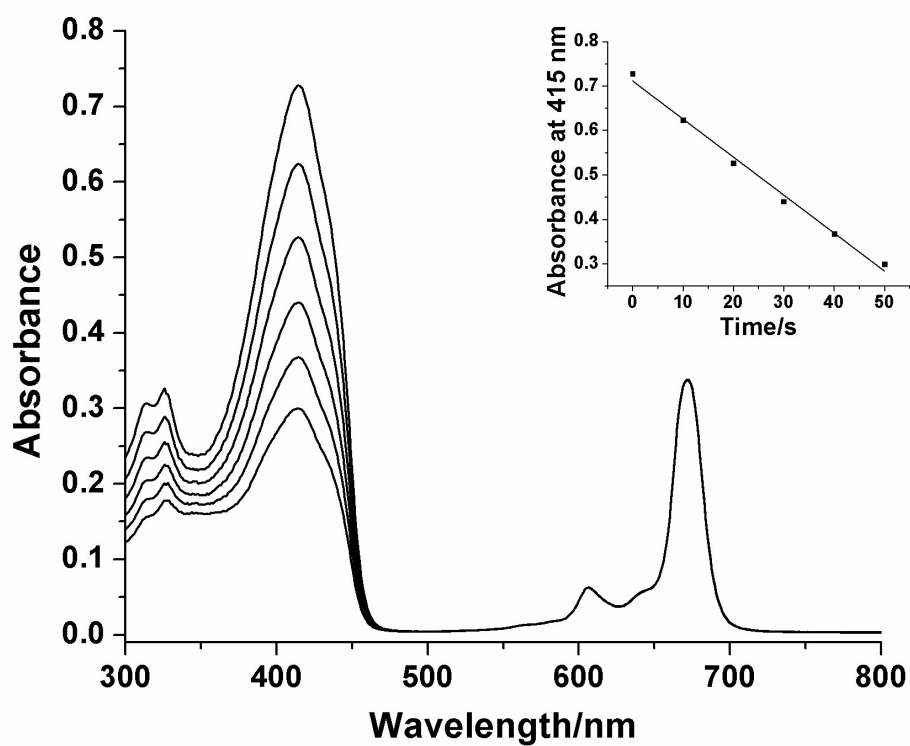

Figure S18. Absorption change of **6** (2  $\mu\text{M}$ ) and DPBF (40  $\mu\text{M}$ ) in DMF upon exposure to red light ( $\lambda > 610 \text{ nm}$ , fluence rate 0.2  $\text{mW}/\text{cm}^2$ ). The insert shows the rates of photodegradation of DPBF with irradiation time.
